# Supplementary material
Source: PubMed Central journal article supplement (PMC3045678)
Supplement: NIHMS273612-supplement-01.pdf [file NIHMS273612-supplement-01.pdf]

Supplemental Table 1. Characteristics (% (n) or mean  $\pm$  SD) of the deceased Type 1 diabetes study population by Mortality Classification Committee (MCC) status

| <b>Variables</b>                       | <b>Classified by MCC</b> | <b>Not yet classified by MCC</b> | <b>p-value</b> |
|----------------------------------------|--------------------------|----------------------------------|----------------|
| <b>N</b>                               | <b>255</b>               | <b>74</b>                        | <b>---</b>     |
| <b>Male sex</b>                        | 49.4 (126)               | 55.4 (41)                        | 0.36           |
| <b>African-American</b>                | 11.8 (30)                | 20.3 (15)                        | 0.06           |
| <b>Age at Diabetes Onset (yr)</b>      | 11.3 $\pm$ 4.0           | 11.1 $\pm$ 3.9                   | 0.76           |
| <b>Diabetes Duration at Death (yr)</b> | 23.6 $\pm$ 9.0           | 28.2 $\pm$ 7.0*                  | <0.001         |
| <b>Age at Death (yr)</b>               | 34.9 $\pm$ 9.1           | 39.3 $\pm$ 7.3*                  | <0.001         |
| <b>Calendar Year of Death</b>          | 1993.5 $\pm$ 8.9         | 1999.3 $\pm$ 7.0*                | <0.001         |
| <b>Pennsylvania Death<sup>a</sup></b>  | 84.7 (216)               | 71.6 (53)*                       | 0.01           |
| <b>Inpatient at Death<sup>b</sup></b>  | 55.6 (140)               | 58.3 (35)                        | 0.70           |
| <b>Autopsy performed</b>               | 28.2 (71)                | 17.9 (10)                        | 0.11           |

\*  $p \leq 0.05$ .

<sup>a</sup> Pennsylvania Death = death occurred in the state of Pennsylvania

<sup>b</sup> Inpatient Death = death occurred as an inpatient in the hospital
